# Supplementary material for: Non-A Blood Type Is a Risk Factor for Poor Cardio-Cerebrovascular Outcomes in Patients Undergoing Dialysis
Source: MDPI journal article supplement (doi:10.3390/biomedicines11020592), 2023-02-16
Supplement: s1 [file s1]

Table S4. The incidence of each clinical outcome in patients with A or AB and patients with B or O

| <b>ABO blood type</b>        | <b>A or AB</b> | <b>B or O</b> | P value |
|------------------------------|----------------|---------------|---------|
| The number of patients, n    | 185            | 180           |         |
| Heart failure, n (%)         | 5 (3%)         | 19 (11%)      | 0.002   |
| Ischemic heart event, n (%)  | 7 (4%)         | 9 (5%)        | 0.57    |
| Cerebrovascular event, n (%) | 11 (6%)        | 11 (6%)       | 0.95    |
| Sudden death, n (%)          | 2 (1%)         | 13 (7%)       | 0.003   |
| All cause death, n (%)       | 24 (13%)       | 38 (21%)      | 0.038   |
