# Supplementary material for: Non-A Blood Type Is a Risk Factor for Poor Cardio-Cerebrovascular Outcomes in Patients Undergoing Dialysis
Source: MDPI journal article supplement (doi:10.3390/biomedicines11020592), 2023-02-16
Supplement: s1 [file s1]

Table S5A. The detail causes of death

| <b>ABO blood type</b>          | <b>A</b> | <b>B</b> | <b>O</b> | <b>AB</b> | <b>Total</b> |
|--------------------------------|----------|----------|----------|-----------|--------------|
| The number of patients, n      | 149      | 81       | 99       | 36        | 365          |
| All cause death, n             | 19 (13%) | 18 (22%) | 20 (20%) | 5 (14%)   | 62           |
| Sudden death, n (%)            | 2        | 7        | 6        | 0         | 15           |
| Infection, n (%)               | 8        | 3        | 6        | 2         | 19           |
| Heart failure, n (%)           | 1        | 3        | 3        | 0         | 7            |
| Acute coronary syndrome, n (%) | 1        | 0        | 0        | 0         | 1            |
| Cerebrovascular events, n (%)  | 0        | 1        | 1        | 1         | 3            |
| Cancer, n (%)                  | 2        | 0        | 1        | 2         | 5            |
| The others, n (%)              | 5        | 4        | 3        | 0         | 12           |
