# Supplementary material for: Non-A Blood Type Is a Risk Factor for Poor Cardio-Cerebrovascular Outcomes in Patients Undergoing Dialysis
Source: MDPI journal article supplement (doi:10.3390/biomedicines11020592), 2023-02-16
Supplement: s1 [file s1]

Table S1. The correlation between dialytic interval and echocardiographic parameters

|                                 | <b>R</b> | <b>p value</b> |
|---------------------------------|----------|----------------|
| LV ejection fraction, %         | -0.06    | 0.28           |
| LV diastolic diameter, mm       | 0.21     | < 0.001        |
| LV systolic diameter, mm        | 0.16     | 0.003          |
| LV wall thickness, mm           | -0.05    | 0.34           |
| LV mass index, g/m <sup>2</sup> | -0.01    | 0.91           |
| Left arterial diameter, mm      | 0.16     | 0.003          |
| E/E'                            | -0.02    | 0.78           |

Abbreviations; LV, left ventricular; E/E', ratio of the early diastolic transmitral flow velocity to mitral annular velocity.
