# Supplementary material for: Non-A Blood Type Is a Risk Factor for Poor Cardio-Cerebrovascular Outcomes in Patients Undergoing Dialysis
Source: MDPI journal article supplement (doi:10.3390/biomedicines11020592), 2023-02-16
Supplement: s1 [file s1]

Table S5B. The detail causes of death

| <b>ABO blood type</b>          | <b>Type A</b> | <b>Non-A type</b> |         |
|--------------------------------|---------------|-------------------|---------|
| The number of patients, n      | 149           | 216               | P value |
| All cause death, n             | 19 (13%)      | 43 (19%)          |         |
| Sudden death, n (%)            | 2 (1%)        | 13 (6%)           | 0.027   |
| Infection, n (%)               | 8 (5%)        | 11 (5%)           | 0.91    |
| Heart failure, n (%)           | 1 (1%)        | 6 (3%)            | 0.15    |
| Acute coronary syndrome, n (%) | 1 (1%)        | 0 (0%)            | 0.23    |
| Cerebrovascular events, n (%)  | 0 (0%)        | 3 (2%)            | 0.15    |
| Cancer, n (%)                  | 2 (1%)        | 3 (1%)            | 0.97    |
| The others, n (%)              | 5 (3%)        | 7 (3%)            | 0.95    |
