# Supplementary material for: Non-A Blood Type Is a Risk Factor for Poor Cardio-Cerebrovascular Outcomes in Patients Undergoing Dialysis
Source: MDPI journal article supplement (doi:10.3390/biomedicines11020592), 2023-02-16
Supplement: s1 [file s1]

Table S6. Cox proportional hazard analyses including history of atrial fibrillation

| Characteristic                                  | Multivariable analyses |           |         |
|-------------------------------------------------|------------------------|-----------|---------|
|                                                 | HR                     | 95% CI    | P value |
| Blood type                                      |                        |           |         |
| Type A, vs. non-A type                          | 0.46                   | 0.26-0.82 | 0.008   |
| Basic data                                      |                        |           |         |
| Age, per 10-year increase                       | 1.47                   | 1.17-1.83 | 0.001   |
| Primary disease of dialysis                     |                        |           |         |
| Diabetes mellitus, vs. non-diabetes mellitus    | 1.24                   | 0.76-2.03 | 0.38    |
| History of cardio- or cerebrovascular disease   | 1.17                   | 0.65-2.11 | 0.61    |
| Medication                                      |                        |           |         |
| Anti-platelet or anti-coagulation               | 1.86                   | 1.04-3.33 | 0.038   |
| Echocardiography                                |                        |           |         |
| LVEF, per 10-% increase                         | 0.79                   | 0.64-0.97 | 0.024   |
| LV mass index, per 10-g/m <sup>2</sup> increase | 1.07                   | 1.01-1.13 | 0.022   |
| History of atrial fibrillation                  | 1.25                   | 0.59-2.67 | 0.56    |

Abbreviations; LV, left ventricular; E/E', ratio of the early diastolic transmitral flow velocity to mitral annular velocity.
