# Supplementary material for: Non-A Blood Type Is a Risk Factor for Poor Cardio-Cerebrovascular Outcomes in Patients Undergoing Dialysis
Source: MDPI journal article supplement (doi:10.3390/biomedicines11020592), 2023-02-16
Supplement: s1 [file s1]

Table S2. Cox proportional hazard analyses including dialytic date-interval

| Characteristic                                   | Multivariable analyses |           |         |
|--------------------------------------------------|------------------------|-----------|---------|
|                                                  | HR                     | 95% CI    | P value |
| Blood type                                       |                        |           |         |
| Type A, vs. non-A type                           | 0.46                   | 0.26-0.81 | 0.007   |
| Basic data                                       |                        |           |         |
| Age, per 10-year increase                        | 1.48                   | 1.18-1.85 | 0.001   |
| Primary disease of dialysis                      |                        |           |         |
| Diabetes mellitus, vs.<br>non-diabetes mellitus  | 1.24                   | 0.76-2.02 | 0.39    |
| History of cardio- or<br>cerebrovascular disease | 1.14                   | 0.63-2.07 | 0.66    |
| Medication                                       |                        |           |         |
| Anti-platelet or anti-coagulation                | 1.92                   | 1.07-3.41 | 0.028   |
| Echocardiography                                 |                        |           |         |
| LVEF, per 10-% increase                          | 0.78                   | 0.63-0.96 | 0.021   |
| LV mass index, per 10-g/m <sup>2</sup> increase  | 1.07                   | 1.01-1.13 | 0.021   |
| Dialytic date-interval, per 1-day increase       | 1.02                   | 0.79-1.31 | 0.90    |

Abbreviations; LV, left ventricular; E/E', ratio of the early diastolic transmitral flow velocity to mitral annular velocity.
