# Supplementary material for: Non-A Blood Type Is a Risk Factor for Poor Cardio-Cerebrovascular Outcomes in Patients Undergoing Dialysis
Source: MDPI journal article supplement (doi:10.3390/biomedicines11020592), 2023-02-16
Supplement: s1 [file s1]

Table S7. Cox proportional hazard analyses including valvular heart disease  $\geq$  moderate

| Characteristic                                  | Multivariable analyses |           |         |
|-------------------------------------------------|------------------------|-----------|---------|
|                                                 | HR                     | 95% CI    | P value |
| Blood type                                      |                        |           |         |
| Type A, vs. non-A type                          | 0.47                   | 0.27-0.83 | 0.009   |
| Basic data                                      |                        |           |         |
| Age, per 10-year increase                       | 1.42                   | 1.13-1.78 | 0.003   |
| Primary disease of dialysis                     |                        |           |         |
| Diabetes mellitus, vs. non-diabetes mellitus    | 1.23                   | 0.75-2.01 | 0.41    |
| History of cardio- or cerebrovascular disease   | 1.09                   | 0.60-1.99 | 0.77    |
| Medication                                      |                        |           |         |
| Anti-platelet or anti-coagulation               | 1.93                   | 1.08-3.45 | 0.027   |
| Echocardiography                                |                        |           |         |
| LVEF, per 10-% increase                         | 0.79                   | 0.64-0.97 | 0.025   |
| LV mass index, per 10-g/m <sup>2</sup> increase | 1.06                   | 1.00-1.12 | 0.042   |
| Valvular disease $\geq$ moderate                | 1.53                   | 0.85-2.75 | 0.15    |

Abbreviations; LV, left ventricular; E/E', ratio of the early diastolic transmitral flow velocity to mitral annular velocity.
