# Supplementary material for: Non-A Blood Type Is a Risk Factor for Poor Cardio-Cerebrovascular Outcomes in Patients Undergoing Dialysis
Source: MDPI journal article supplement (doi:10.3390/biomedicines11020592), 2023-02-16
Supplement: s1 [file s1]

Table S3. The incidence of each clinical outcome in each blood type

| <b>ABO blood type</b>        | <b>A</b> | <b>B</b> | <b>O</b> | <b>AB</b> | <b>Total</b> |
|------------------------------|----------|----------|----------|-----------|--------------|
| The number of patients, n    | 149      | 81       | 99       | 36        | 365          |
| Heart failure, n (%)         | 3 (2%)   | 6 (7%)   | 13 (13%) | 2 (6%)    | 24           |
| Ischemic heart event, n (%)  | 6 (4%)   | 4 (5%)   | 5 (5%)   | 1 (3%)    | 16           |
| Cerebrovascular event, n (%) | 5 (3%)   | 4 (5%)   | 7 (7%)   | 6 (17%)   | 22           |
| Sudden death, n (%)          | 2 (1%)   | 7 (9%)   | 6 (6%)   | 0 (0%)    | 15           |
| All cause death, n (%)       | 19 (13%) | 18 (22%) | 20 (20%) | 5 (14%)   | 62           |
